# Supplementary material for: Socio-emotional challenges and development of children left behind by migrant mothers
Source: PubMed Central journal article supplement (PMC7182358; doi:10.7189/jogh.10.010806), 2020-06
Supplement: jogh-10-010806-s001.pdf [file jogh-10-010806-s001.pdf]

Supplementary Table 1 Prevalence of suspected developmental delay across different primary caregivers groups (N=1880)

|                                     | Children living | Children with migrating mothers and living with other primary caregivers |              |              |                     | <i>P</i> value |
|-------------------------------------|-----------------|--------------------------------------------------------------------------|--------------|--------------|---------------------|----------------|
|                                     | with mothers    | Fathers                                                                  | Grandmothers | Grandfathers | Others <sup>1</sup> |                |
| N(%)                                | 1563(83.1)      | 25(1.3)                                                                  | 205(10.9)    | 81(4.3)      | 6(0.3)              |                |
| Total Suspected Developmental Delay | 21.6%           | 28.0%                                                                    | 22.9%        | 35.8%        | 33.3%               | 0.005          |
| Communication                       | 7.5%            | 12.0%                                                                    | 10.7%        | 9.9%         | 16.7%               | 0.043          |
| Fine motor                          | 6.5%            | 4.0%                                                                     | 5.4%         | 9.9%         | 16.7%               | 0.018          |
| Gross motor                         | 7.2%            | 8.0%                                                                     | 6.3%         | 6.2%         | 33.3%               | 0.047          |
| Problem solving                     | 7.4%            | 12.0%                                                                    | 4.9%         | 4.9%         | 16.7%               | 0.018          |
| Personal social                     | 7.4%            | 16.0%                                                                    | 10.2%        | 17.3%        | 0                   | 0.002          |
| Social emotional                    | 27.3%           | 44.0%                                                                    | 30.2%        | 37.0%        | 33.3%               | 0.095          |

<sup>1</sup>
